# Supplementary material for: Complete Mitochondrial Genomes and Phylogenetic Positions of Two Longicorn Beetles, Anoplophora glabripennis and Demonax pseudonotabilis (Coleoptera: Cerambycidae)
Source: MDPI journal article supplement (doi:10.3390/genes13101881), 2022-10-17
Supplement: s1 [file s1]

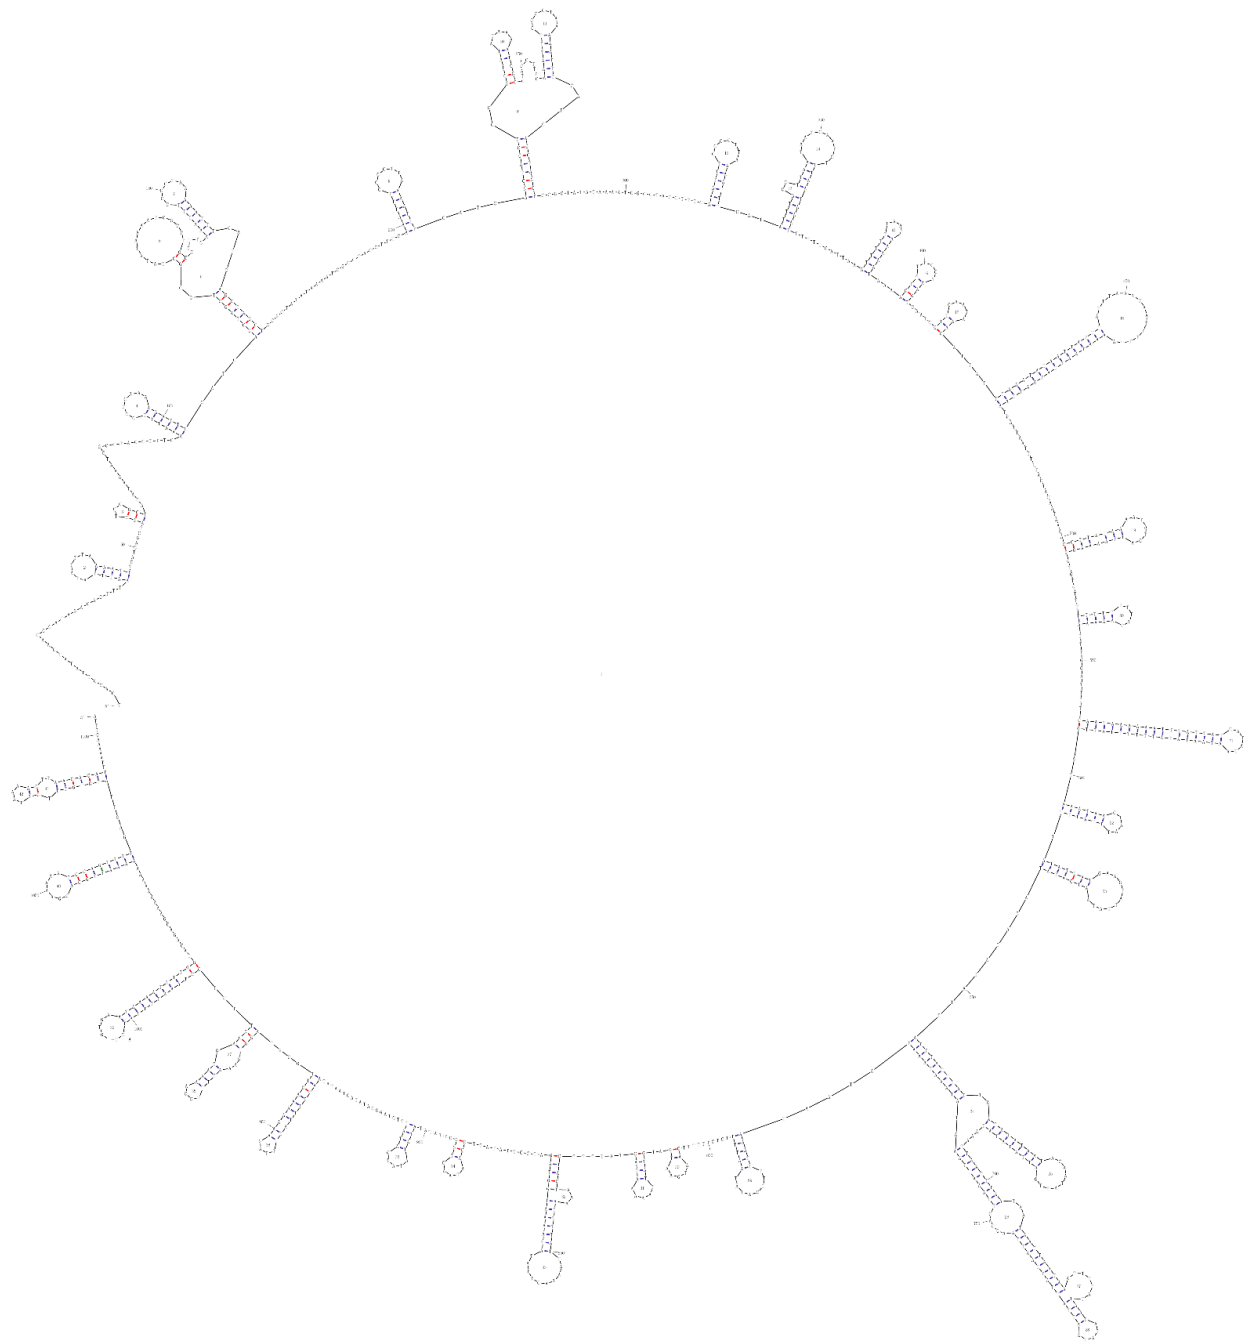

$dG = -90.18\ 13$

**Figure S1.** Predicted stem-loop structures in the control region of *Anoplophora glabripennis*.

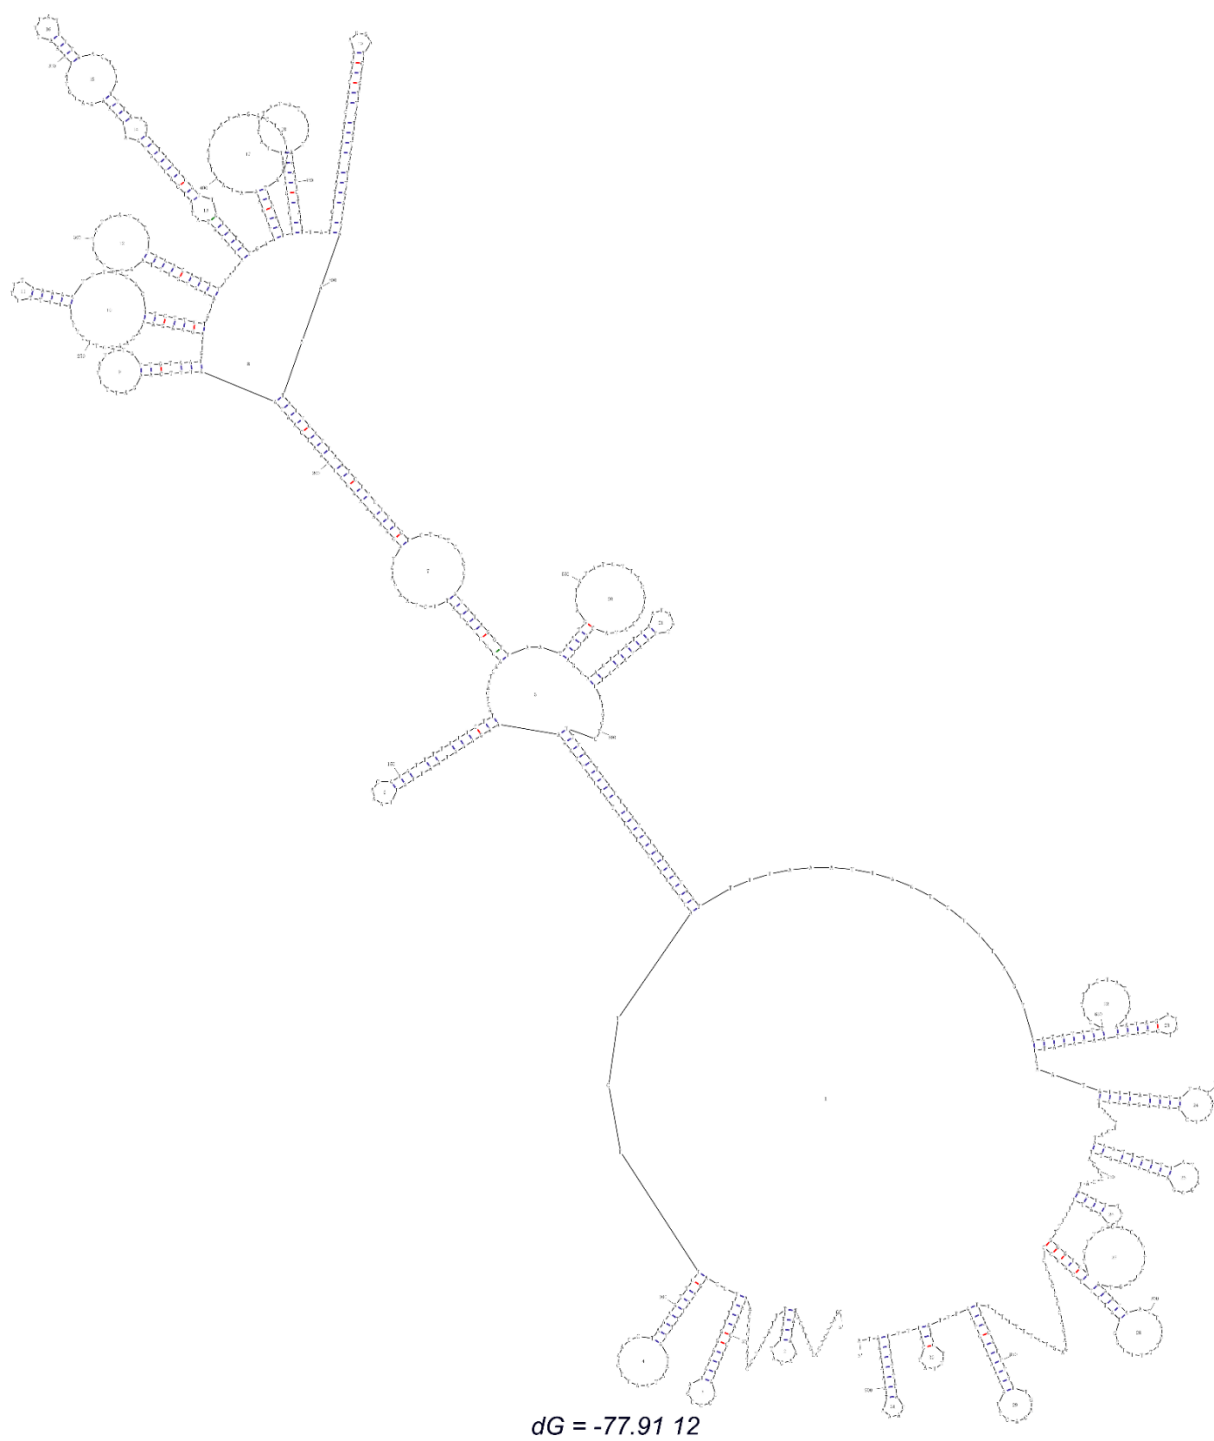

**Figure S2.** Predicted stem-loop structures in the control region of *Demonax pseudonotabilis*.
